# Supplementary material for: Factors affecting haemoglobin dynamics in African children with acute uncomplicated Plasmodium falciparum malaria treated with single low-dose primaquine or placebo
Source: Springer Nature journal article supplement (doi:10.1186/s12916-023-03105-0), 2023-10-20

**Figure S1. Changes in the mean haemoglobin concentrations showing the malaria attributable fractions in all treated children, irrespective of G6PD status and treatment.**

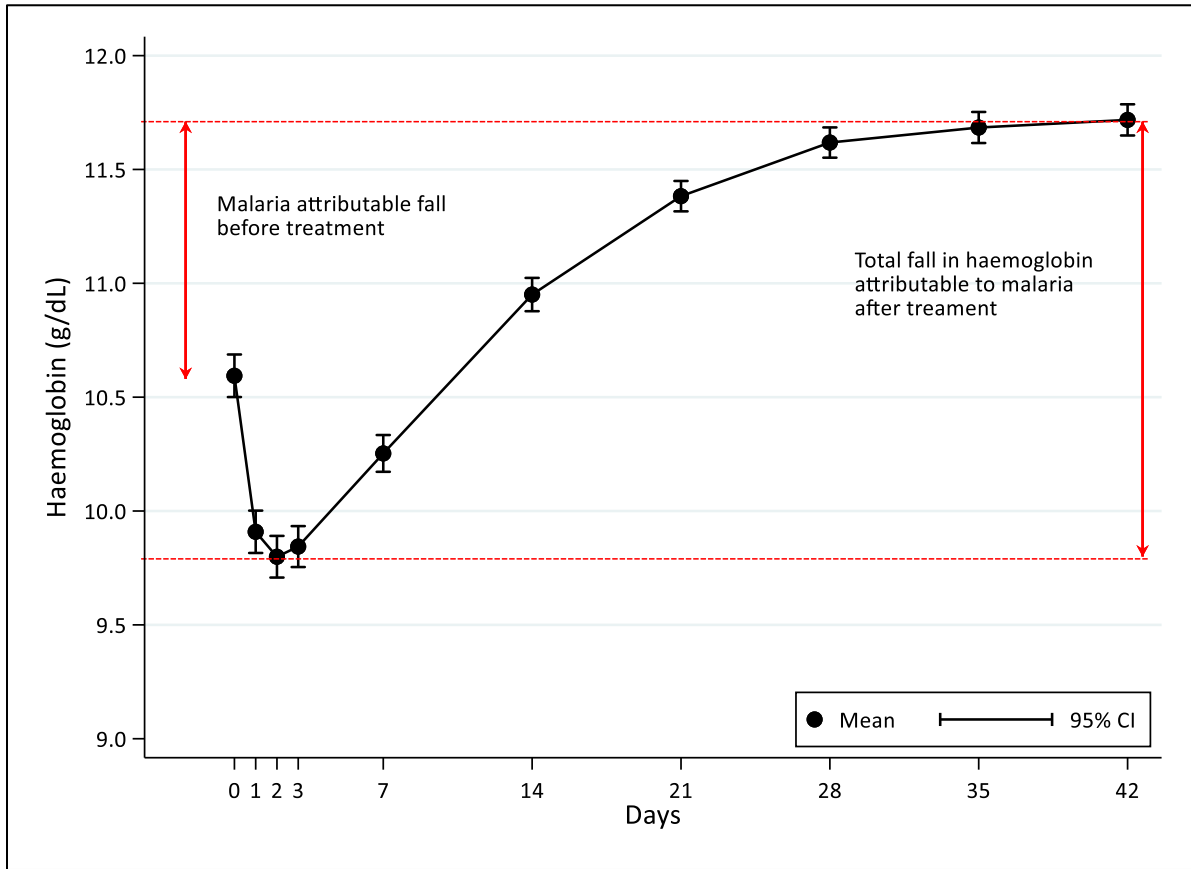

Supplement: MOESM1 [file 26207784]
